# Supplementary material
Source: Springer Nature journal article supplement (https://www.springermedizin.de/resource/supplementary/12904_2013_201_MOESM1_ESM.pdf/9517738)
Supplement: MOESM1 [file 9517738]

**Uncertain  
knowledge**

**Life limitation**

**Excess**

**Chance**

**No idea**

**Cancer**

**Sufficient  
structures**

**Better structures**

**Speculations**

**Death and dying**

**We already offer  
PC**

**Financial  
opportunity**

**Terminal care**

**PC insufficient  
for MS patients**

**Continuity of  
care**

**End of disease  
modification**

**Qualified care**

**Deterrence**

**Pain  
management**
